# Supplementary material for: CoSe2/porous carbon shell composites as high-performance catalysts toward tri-iodide reduction in dye-sensitized solar cells
Source: Royal Society of Chemistry journal article supplement (doi:10.1039/c9qi00859d), 2019-01-01
Supplement: c9qi00859d1.pdf [file c9qi00859d1.pdf]

## CoSe<sub>2</sub>/Porous Carbon Shell composites as High-performance Catalysts toward Tri-iodide Reduction in Dye-sensitized Solar Cells

Weidan Li,<sup>a</sup> Pin Ma,<sup>b</sup> Fanfan Chen,<sup>a</sup> Rui Xu,<sup>c</sup> Zhihai Cheng,<sup>c</sup> Xiong Yin,<sup>\*a</sup> Yuan Lin,<sup>b</sup> and Leyu Wang<sup>\*a</sup>

<sup>a</sup> State Key Laboratory of Chemical Resource Engineering, Beijing Advanced Innovation Center for Soft Matter Science and Engineering, College of Chemistry, Beijing University of Chemical Technology, Beijing 100029, P. R. China.

*E-mails:* [yinxiong@mail.buct.edu.cn](mailto:yinxiong@mail.buct.edu.cn); [lywang@mail.buct.edu.cn](mailto:lywang@mail.buct.edu.cn)

<sup>b</sup> Beijing National Laboratory for Molecular Sciences, Key Laboratory of Photochemistry, CAS Research/Education Center for Excellence in Molecular Sciences, Institute of Chemistry, Chinese Academy of Sciences, Beijing 100190, P. R. China.

<sup>c</sup> Beijing Key Laboratory of Optoelectronic Functional Materials & Micro-nano devices, Department of Physics, Renmin University of China, Beijing 100872, P. R. China.

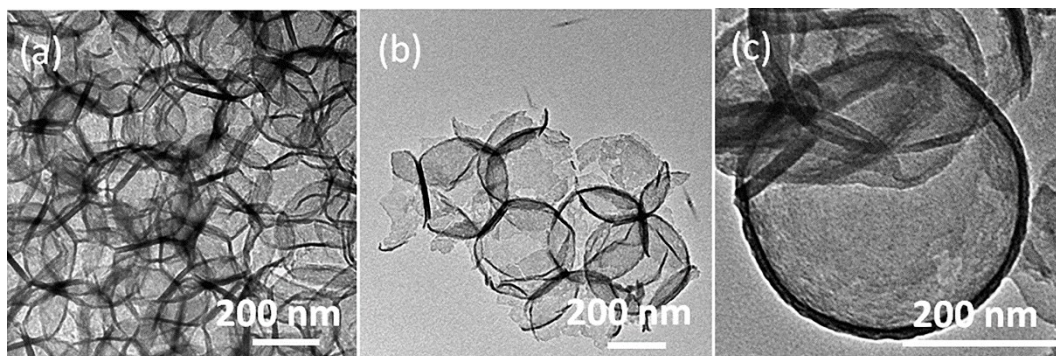

**Figure S1.** TEM images of blank carbon shell sample via carbonization at 800 °C

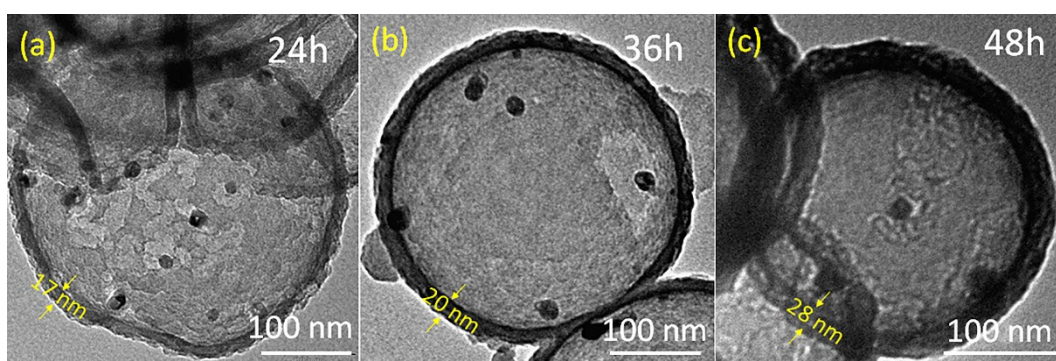

**Figure S2.** TEM images of CoSe<sub>2</sub>/CS sample prepared at different coating time

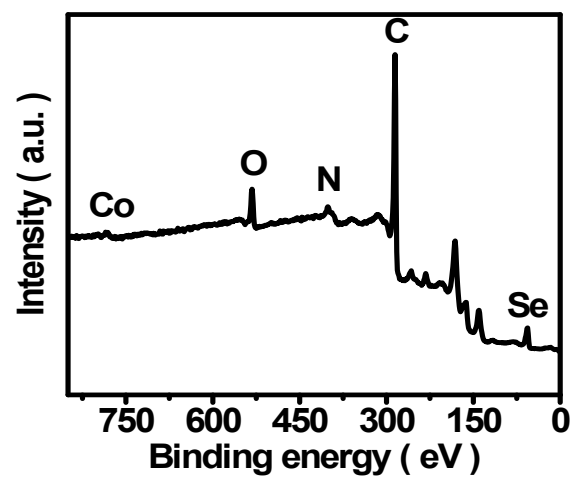

**Figure S3.** The XPS survey spectra of CoSe<sub>2</sub>/CS sample.

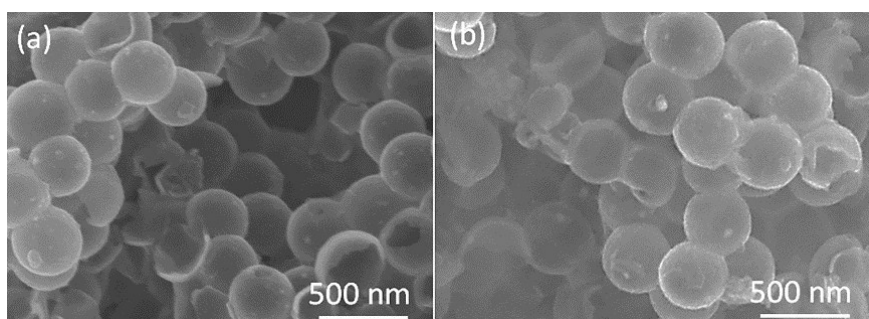

**Figure S4** SEM image for CoSe<sub>2</sub>/CS-based electrode before (a) and after (b) 100-cycle CV test.

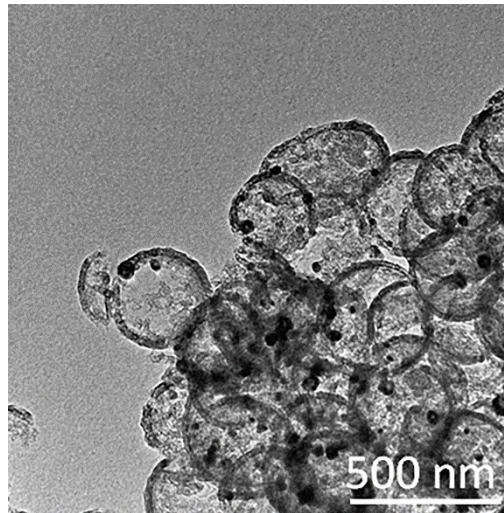

**Figure S5** TEM image for CoSe<sub>2</sub>/CS sample prepared with 0.2 mmol Co(NO<sub>3</sub>)<sub>2</sub>.

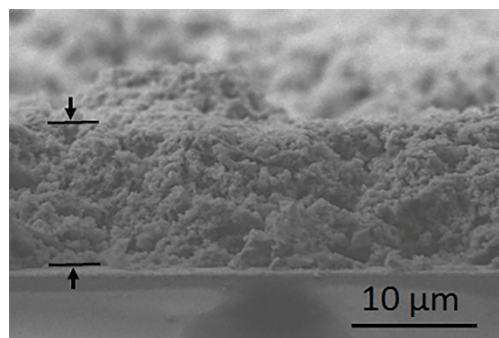

**Figure S6** The cross-sectional SEM image of CoSe<sub>2</sub>/CC film deposited on the FTO substrate
